# Supplementary material for: Removal of nonylphenol ethoxylate from laundry wastewater using modified and functionalized activated carbon
Source: Royal Society of Chemistry journal article supplement (doi:10.1039/d3ew00329a), 2023-01-01
Supplement: d3ew00329a2.pdf [file d3ew00329a2.pdf]

### Supplementary Material

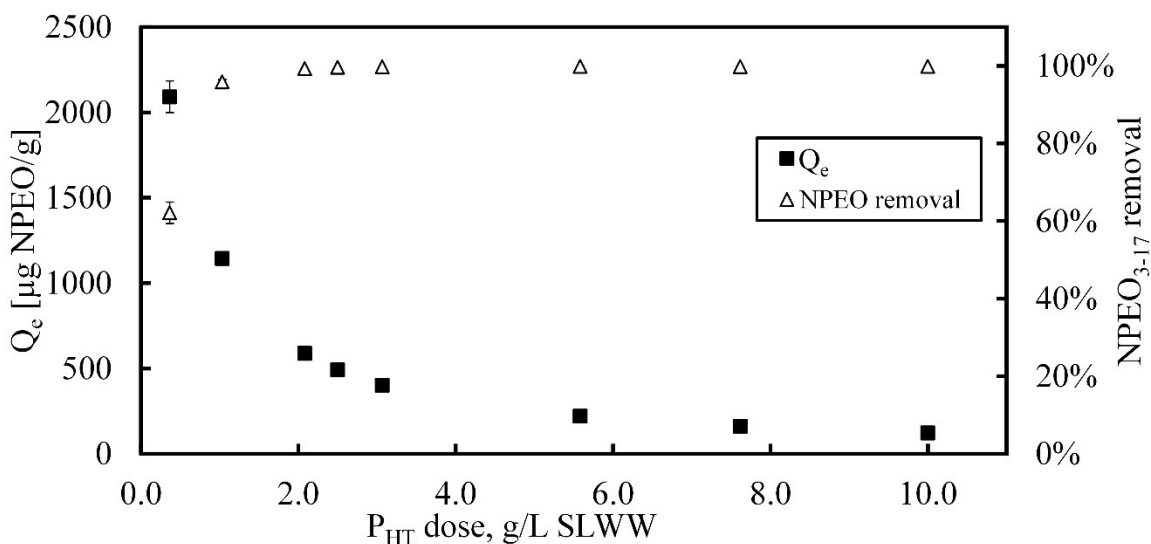

**Figure S1.** Effect of  $P_{HT}$  dose on the  $NPEO_{3-17}$  removal and adsorption capacity

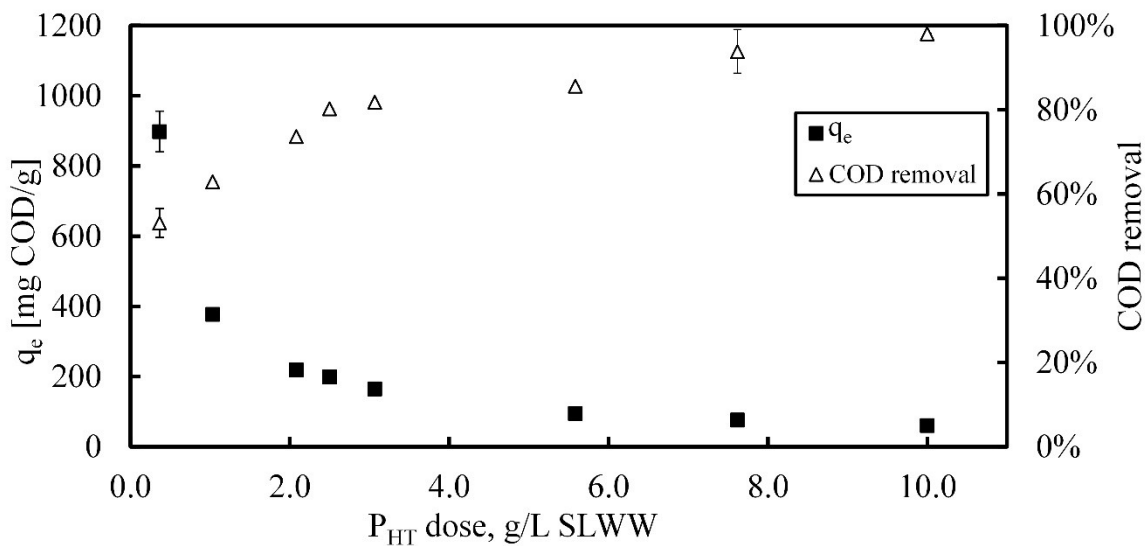

**Figure S2.** Effect of  $P_{HT}$  dose on the COD removal and adsorption capacity
